# Supplementary material for: A long-term proxy for sea ice thickness in the Canadian Arctic: 1996–2020
Source: Copernicus journal article supplement (doi:10.5194/tc-17-3269-2023), 2023-08-15
Supplement: Supplementary file 1 [file tc-17-3269-2023-supplement.pdf]

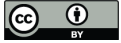

*Supplement of*

## **A long-term proxy for sea ice thickness in the Canadian Arctic: 1996–2020**

**Isolde A. Glissenaar et al.**

*Correspondence to:* Isolde A. Glissenaar ([isolde.glissenaar@bristol.ac.uk](mailto:isolde.glissenaar@bristol.ac.uk))

The copyright of individual parts of the supplement might differ from the article licence.

## Supplementary Materials

Table S1. Canadian Ice Service ice chart availability for November-April

|              | Western Arctic                                           | Eastern Arctic                                           |
|--------------|----------------------------------------------------------|----------------------------------------------------------|
| 1996         | Nov: weekly<br>Dec: biweekly<br>Jan-Apr: monthly         | Nov: weekly<br>Dec: biweekly<br>Jan-Apr: monthly         |
| 1997-2000    | Nov: weekly<br>Dec: biweekly<br>Jan-Apr: monthly         | Nov: weekly<br>Dec: biweekly<br>Jan-Apr: monthly         |
| 2001-2005    | Nov: weekly<br>Dec: biweekly<br>Jan-Apr: monthly         | Nov: weekly<br>Dec: biweekly<br>Jan-Apr: monthly         |
| 2006         | Nov-Dec: weekly<br>Jan-Feb: monthly<br>Mar-Apr: biweekly | Nov-Dec: weekly<br>Jan-Feb: monthly<br>Mar-Apr: biweekly |
| 2007         | Nov-Dec: weekly<br>Jan-Mar: biweekly<br>Apr: weekly      | Nov-Dec: weekly<br>Jan-Mar: biweekly<br>Apr: weekly      |
| 2008-2010    | Nov-Apr: weekly                                          | Nov-Apr: weekly                                          |
| 2011-present | Nov-Apr: weekly                                          | Nov-Apr: weekly                                          |

Table S2. List of used predictor features

|                                             |                                      |
|---------------------------------------------|--------------------------------------|
| Partial concentration New Ice               | Partial concentration pancake ice    |
| Partial concentration Nilas                 | Partial concentration small ice cake |
| Partial concentration Young Ice             | Partial concentration ice cake       |
| Partial concentration Grey Ice              | Partial concentration small floe     |
| Partial concentration Grey White Ice        | Partial concentration medium floe    |
| Partial concentration FYI                   | Partial concentration big floe       |
| Partial concentration thin FYI              | Partial concentration vast floe      |
| Partial concentration first stage thin FYI  | Partial concentration giant floe     |
| Partial concentration second stage thin FYI | Partial concentration fast ice       |
| Partial concentration medium FYI            | Scatterometer backscatter            |
| Partial concentration thick FYI             |                                      |
| Partial concentration Old Ice               |                                      |
| Partial concentration second-year ice       |                                      |
| Partial concentration MYI                   |                                      |

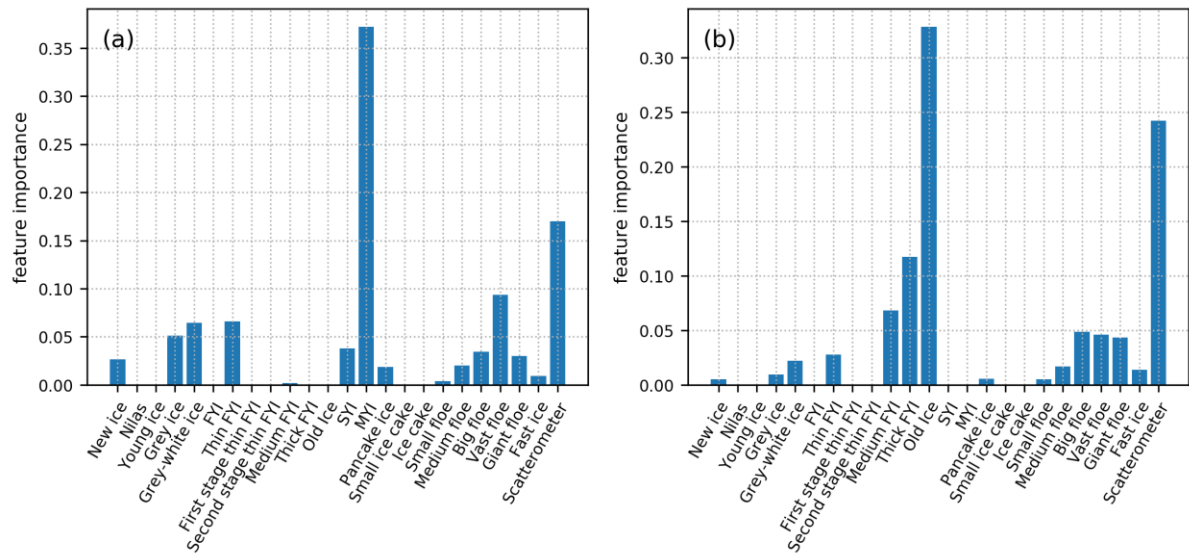

Figure S1. Feature importance in the Random Forest Regression model for (a) November C-band and (b) April C-band.

Table S3. Number of datapoints Random Forest Regression models are trained on.

|          | C-band | Ku-band |
|----------|--------|---------|
| November | 21935  | 14642   |
| December | 29326  | 23529   |
| January  | 28829  | 25873   |
| February | 27225  | 20378   |
| March    | 29135  | 20643   |
| April    | 30601  | 25004   |

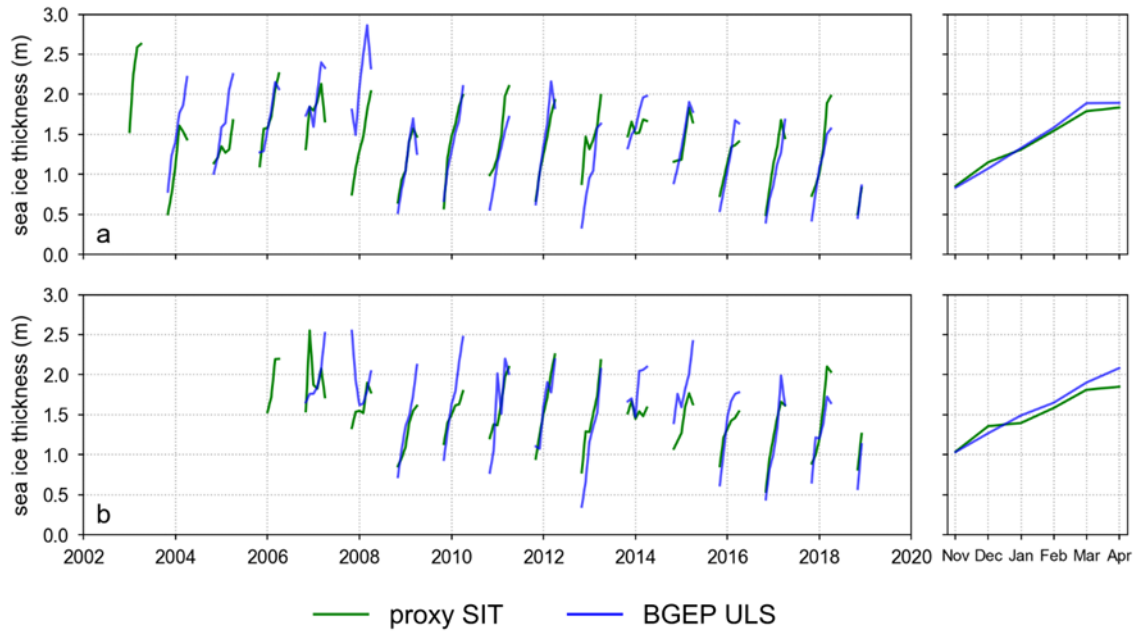

Figure S2. BGEP ULS moorings (a) location A and (b) location D (for locations see Fig 1) and the proxy\_corr sea ice thickness product. Graphs on right-hand side show mean seasonal cycle for both locations.

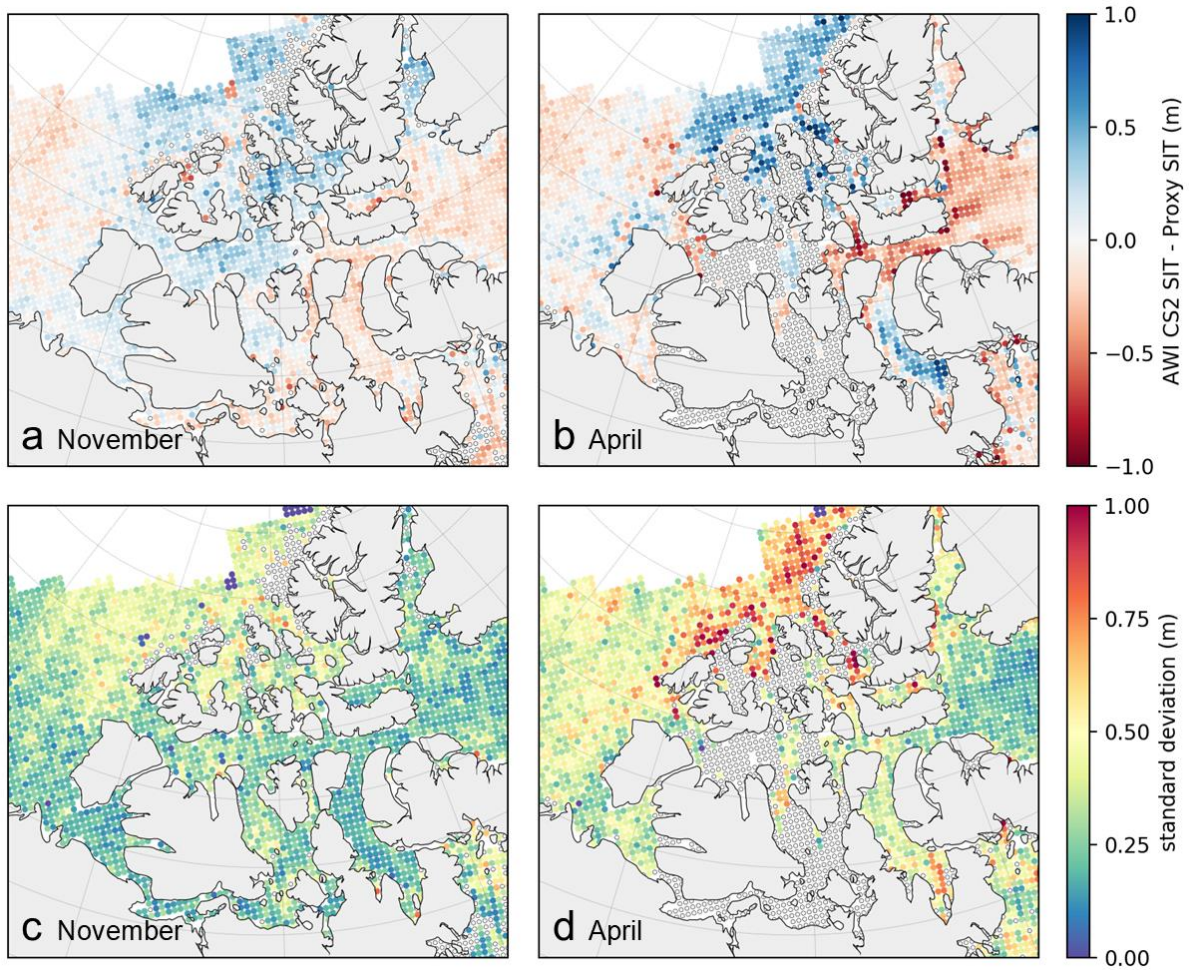

Figure S3. Comparison between AWI CS2 SIT (Hendricks and Paul, 2022) and the proxy\_corr SIT product. (a,b) The mean difference between the two products for 2010-2020 for November (a) and April (b). (c,d) The standard deviation in the difference between the two products. The top 5 percentile SIT uncertainty was removed from the AWI CS2 SIT, resulting in SIT observations with an uncertainty higher than 0.55 m in November and higher than 0.90 m in April being removed. No value is given where more than half the years are missing in the AWI CS2 SIT product (either no observations or top 5 percentile uncertainty).

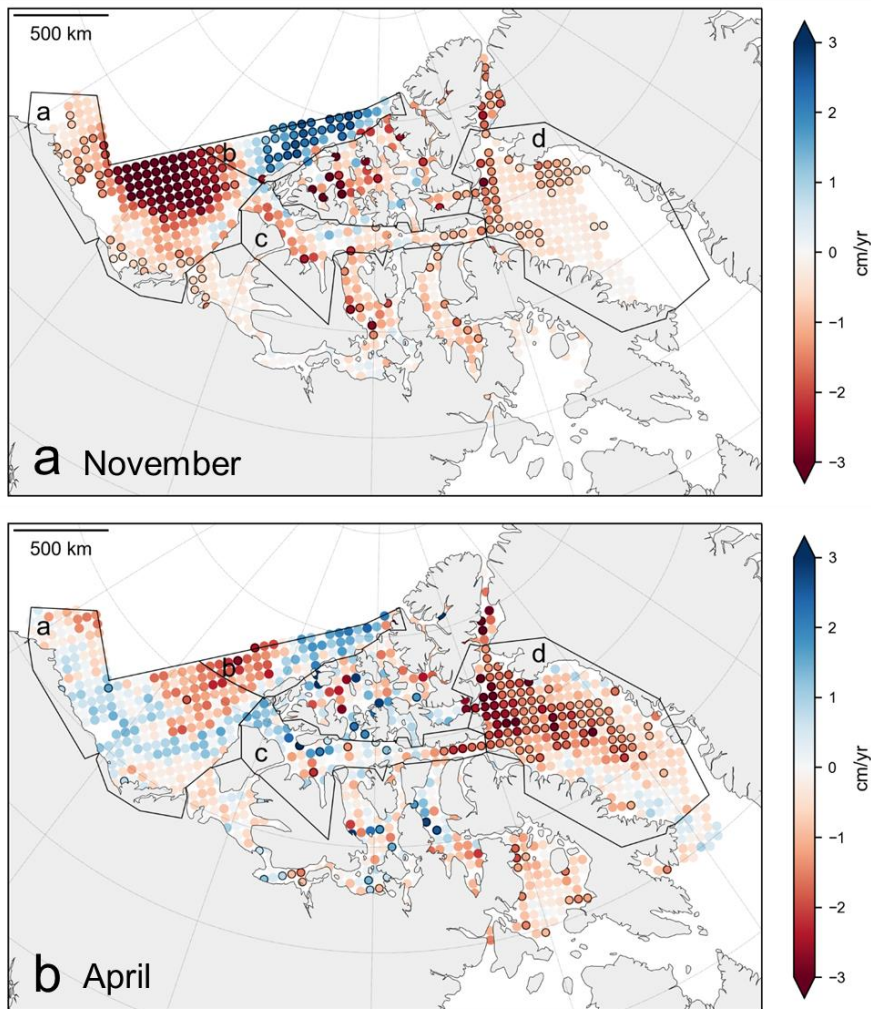

Figure S4. Sea ice thickness trends from the proxy\_nocorr SIT product for (a) November and (b) April 1996-2020. Solid outline circles where statistically significant ( $p < 0.05$ ).

Stefan Hendricks, & Stephan Paul. (2022). Product User Guide & Algorithm Specification: AWI CryoSat-2 Sea Ice Thickness (version 2.5) (2.5). Zenodo. <https://doi.org/10.5281/zenodo.7416200>
